## Spondylodiscitis: update on diagnosis and management

Theodore Gouliouris\*, Sani H. Aliyu and Nicholas M. Brown

Clinical Microbiology and Public Health Laboratory, Addenbrooke's Hospital, Cambridge CB2 0QW, UK

\*Corresponding author. Tel: +44-1223-257057; Fax: +44-1223-242775; E-mail: theodore.gouliouris@addenbrookes.nhs.uk

Spondylodiscitis, a term encompassing vertebral osteomyelitis, spondylitis and discitis, is the main manifestation of haematogenous osteomyelitis in patients aged over 50 years. *Staphylococcus aureus* is the predominant pathogen, accounting for about half of non-tuberculous cases. Diagnosis is difficult and often delayed or missed due to the rarity of the disease and the high frequency of low back pain in the general population. In this review of the published literature, we found no randomized trials on treatment and studies were too heterogeneous to allow comparison. Improvements in surgical and radiological techniques and the discovery of antimicrobial therapy have transformed the outlook for patients with this condition, but morbidity remains significant. Randomized trials are needed to assess optimal treatment duration, route of administration, and the role of combination therapy and newer agents.

**Keywords:** vertebral osteomyelitis, discitis, spinal infections

### Historical perspective

Infection of the spine is an ancient disease, with changes consistent with tuberculosis described in human skeletons dating back to the Iron Age.<sup>1</sup> The first account of pyogenic vertebral osteomyelitis is credited to the French physician Lannelongue in 1879. The first large series of pyogenic vertebral infections in the English literature was published by Kulowski in 1936.<sup>2</sup> Improvements in surgical and radiological techniques and the discovery of antimicrobial therapy have transformed the outlook for patients with this condition, but morbidity remains significant.

### Definitions

Spinal infections can be described aetiologically as pyogenic, granulomatous (tuberculous, brucellar, fungal) and parasitic.<sup>3</sup> Pyogenic spinal infections include: spondylodiscitis, a term encompassing vertebral osteomyelitis, spondylitis and discitis, which are considered different manifestations of the same pathological process; epidural abscess, which can be primary or secondary to spondylodiscitis; and facet joint arthropathy.<sup>3</sup> Other anatomical classification schemes exist.<sup>4</sup>

### Search methodology

We searched PubMed using the terms (vertebral\* OR spinal\*) AND (infection\* OR osteomyelitis\* OR discitis\* OR spondylodiscitis\* OR septic discitis\*) for studies published in English or French between 1 January 1980 and 31 October 2009 and screened the bibliographies of the retrieved articles. In this review, we concentrated mainly on published series of pyogenic spondylodiscitis that involved more than 10 patients; only a few studies were

multicentre,<sup>5</sup> or prospective<sup>6–8</sup> or systematic reviews.<sup>9</sup> No randomized trials for the treatment of pyogenic vertebral osteomyelitis were found, although randomized studies for the prevention of post-operative spinal infections exist. Most studies identified were heterogeneous in design with variable inclusion criteria based on age, aetiology, patient groups and use of a particular diagnostic or treatment modality; direct comparison between studies was therefore not possible.

### Epidemiology of spondylodiscitis

Although rare, spondylodiscitis is the main manifestation of haematogenous osteomyelitis in patients aged over 50 years<sup>10,11</sup> and represents 3–5% of all cases of osteomyelitis.<sup>12</sup> Estimates of its incidence in developed countries range from 4 to 24 per million per year<sup>13–20</sup> depending on location, era and inclusion criteria of the studies (for example children, tuberculous cases). A number of studies report a bimodal age distribution with peaks at age less than 20 years and in the group aged 50–70 years, though all ages can be affected.<sup>14,16,21,22</sup> Vertebral osteomyelitis has a male preponderance, with a male to female ratio of 1.5–2:1.<sup>9,15,22</sup>

The incidence of vertebral infections has been rising through the combined effect of an increase in the susceptible population and improved ascertainment, due to better diagnosis.<sup>10,22–25</sup> Two Danish studies from the same group have observed an increase in the prevalence of vertebral osteomyelitis in patients with *Staphylococcus aureus* bacteraemia, doubling from 1.1% to 2.2% in the period from 1980 to 1990.<sup>10,26</sup> Other reports attribute the increase of spondylodiscitis cases to intravenous drug use,<sup>23</sup> to the rise in healthcare-associated infection,<sup>27</sup> spinal surgery<sup>28</sup> and the increase in the immunosuppressed and ageing population.<sup>29</sup>

## Pathogenesis of pyogenic spondylodiscitis

Pathogens can infect the spine via three routes: by haematogenous spread, by direct external inoculation, or by spread from contiguous tissues. The haematogenous arterial route is predominant, allowing seeding of infection from distant sites onto the vertebral column.

An understanding of the vascular supply of the spine and its development with age is important in distinguishing the two main patterns of disease encountered in adults and children. In children, intraosseous arteries display extensive anastomoses and vascular channels penetrate the disc. Therefore, a septic embolus is unlikely to produce a substantial osseous infarct and the infection is often limited to the disc. By contrast, in adults the disc is avascular and the intraosseous anastomoses involute by the third decade of life, effectively creating end arteries, meaning that a septic embolus results in a large infarct.<sup>30</sup> The subsequent spread of infection to the neighbouring disc and vertebra creates the characteristic lesion of spondylodiscitis.<sup>31,32</sup> Extensive infarction leads to wedging, cavitation and compression fractures with resulting spinal instability, deformity and risk of cord compression. Uncontrolled infection can breach the bone and track into surrounding soft tissues, causing paravertebral or psoas abscesses, and spread posteriorly into the spinal canal, forming an epidural abscess with further risk of paraplegia, subdural abscess and meningitis.

Of note, pyogenic osteomyelitis of the posterior elements of the vertebrae (pedicles, transverse processes, laminae and posterior spinous processes) is very rarely encountered in haematogenous infections due to their relatively poor blood supply compared with the vertebral body.<sup>33</sup> Posterior involvement is more common with tuberculous and fungal spondylitis.<sup>7,34,35</sup>

Haematogenous pyogenic spondylodiscitis affects preferentially the lumbar spine, followed by the thoracic and cervical spine in decreasing frequency (58%, 30% and 11% respectively),<sup>9</sup> possibly reflecting the relative proportions of blood flow. Cervical lesions are commoner in intravenous drug users.<sup>36</sup> Multifocal involvement occurs in 4% of cases.<sup>9</sup> Tuberculous lesions more commonly affect the thoracic spine in most series<sup>18,37–40</sup> and are more likely to involve more than two (sometimes non-contiguous) vertebrae compared with pyogenic cases.<sup>18,37,41</sup>

Direct inoculation is most commonly iatrogenic following spinal surgery, lumbar puncture or epidural procedures and accounts for up to 25–30% of cases in some spondylodiscitis series.<sup>5,42</sup> In vertebral infections, the posterior parts are usually affected.<sup>6</sup> Infection of implanted prosthetic material is an important predisposing factor following surgery. Rarely, spondylodiscitis may follow stab or gunshot wounds to the spine.<sup>24,43</sup>

Contiguous spread is rare. It can occur from any adjacent infective focus, commonly from aortic graft infections, a ruptured oesophagus or a retropharyngeal abscess.

## Aetiology and microbiology

A distant focus of infection has been identified in almost half of cases of spondylodiscitis. Mylona et al.<sup>9</sup> described these to include the genitourinary tract (17%), skin and soft tissue (11%), intravascular devices (5%), gastrointestinal tract (5%),

respiratory tract (2%) and the oral cavity (2%). Infective endocarditis was reported in 12%.

Multiple studies report on other predisposing factors. Diabetes mellitus is the most commonly identified risk factor,<sup>16</sup> but others include advanced age,<sup>20,29</sup> injecting drug use,<sup>23,24</sup> immunosuppression,<sup>44,45</sup> malignancy, renal failure, rheumatological disease, liver cirrhosis and previous spinal surgery.<sup>6</sup>

Although a wide range of organisms have been associated with spondylodiscitis (bacterial, mycobacterial, fungal and parasitic), it remains primarily a monomicrobial bacterial infection. *S. aureus* is the predominant pathogen, accounting for half of non-tuberculous cases (range 20–84%).<sup>3,5,7,8,13,17–19,23,24,27,29,43,46–52</sup> The proportion of *S. aureus* bloodstream infections complicated by vertebral osteomyelitis ranges from 1.7% (146 of 8739 cases) to 3% (22 of 724 cases) in two large series.<sup>10,53</sup> Patients with the highest risk (6% of *S. aureus* bloodstream infections) are those aged over 50 years with community acquisition and no obvious portal of entry of infection.<sup>10</sup> The risk in patients with intravascular device-related bacteraemia in a study by Fowler et al.<sup>54</sup> was 2.2% (7 of 324 cases). Methicillin resistance has increasingly been reported over the last two decades.<sup>3,27,55</sup> Whilst the emergence of community-acquired methicillin-resistant *S. aureus* (MRSA) positive for Panton-Valentine leucocidin causing childhood osteomyelitis is a concern, cases affecting the spine are extremely rare at present.<sup>56,57</sup>

Enterobacteriaceae account for 7%–33% of pyogenic spondylodiscitis cases. Most cases are accounted for by *Escherichia coli*; the other major members of this group are *Proteus*, *Klebsiella* and *Enterobacter* spp.<sup>5,7,8,13,18,27,29,43,46,48,50,51</sup> They are associated with urinary tract infections and older age. In one study of 72 patients, *E. coli* was isolated exclusively from patients aged over 63 years.<sup>58</sup> *Salmonella* infection is rare and classically reported in patients with sickle cell disease, although it is also recognized in non-sickle cell disease patients, related to aortic mycotic aneurysms.<sup>59</sup>

*Pseudomonas aeruginosa* is an uncommon cause of spondylodiscitis. In a series of 61 patients from 1969–79 with a predominantly intravenous drug user population, *P. aeruginosa* topped the list of pathogens and was isolated in 48% of cases.<sup>24</sup> This finding has not been replicated elsewhere and *S. aureus* remains the main causative organism in intravenous drug users.<sup>29,60</sup>

Coagulase-negative staphylococci (CoNS) feature prominently in most large series and account for 5%–16% of cases.<sup>3,7,8,18,24,27,29,43,46,48,50</sup> *Staphylococcus epidermidis* is the most frequently identified species and is associated with intracardiac device-related bacteraemia<sup>61,62</sup> and post-operative infections.<sup>6,18,42</sup> There are a few reports of *Staphylococcus lugdunensis* in the series reviewed.<sup>8,61,63,64</sup> The criteria for determining the significance of CoNS vary, some authors employing parameters such as multiple cultures with the same organism<sup>7,8,46</sup> or concurrent infective endocarditis<sup>8,61,62</sup> and others interpreting the isolates in the light of the clinical picture and reported resolution of symptoms with targeted treatment.

Streptococci (viridans type and  $\beta$ -haemolytic streptococci, particularly groups A and B) and enterococci are well described causes of spondylodiscitis (5%–20%)<sup>3,5,27,29,43,46–50,52</sup> and in one study were strongly associated with infective endocarditis (26%) when compared with staphylococcal cases (3%).<sup>65</sup>

*Streptococcus pneumoniae* is a very rare cause of spondylodiscitis.<sup>66</sup> In a large review of 2064 cases of invasive pneumococcal disease, vertebral osteomyelitis was reported in only two.<sup>67</sup>

Anaerobes constitute rare causes of spondylodiscitis and were observed in less than 4% of cases.<sup>3,5,8,18,43,50,52</sup> *Propionibacterium acnes* ranks amongst the commonest and is linked with indolent post-operative discitis, often related to implanted material.<sup>6,68</sup> *Bacteroides fragilis* and other anaerobes are most commonly associated with contiguous spread from pelvic or intra-abdominal foci of infection.<sup>69,70</sup>

Polymicrobial infections are uncommon and are most likely to result from contiguous spread. They are reported in <10% of cases.<sup>9</sup> However, in one study where all patients underwent biopsy, 51% yielded one organism, 16% two organisms and 8% more than two organisms,<sup>3</sup> suggesting under-recognition in most series.

Brucellosis, the commonest zoonosis in endemic areas,<sup>71</sup> can account for 21–48% of spinal infections, representing the predominant cause in some series from the Mediterranean Basin and the Middle East.<sup>7,18,46,72</sup> Infection occurs secondary to consumption of unpasteurized contaminated dairy products or contact with infected animals.<sup>73</sup> Osteoarticular infections are frequent and a possible genetic susceptibility attributed to allele HLA-B\*39<sup>74</sup> has been described. Spondylitis accounts for 7.5%–30% of cases of brucellosis and is most commonly caused by *Brucella melitensis*.<sup>73,75–78</sup> Patients with brucellosis who develop spondylitis tend to be older and have a longer duration of symptoms.<sup>76,77</sup>

Tuberculosis (TB) is the commonest cause of spinal infection worldwide,<sup>79</sup> and accounts for 9%–46% of cases in developed countries.<sup>7,18,20,41,46,50,72</sup> Skeletal involvement occurs in 1%–3% of TB infections, half of these affecting the spine.<sup>79</sup> In countries of low TB incidence, it is commonly encountered in ethnic groups originating from areas of high endemicity.<sup>17,40,80–82</sup> In the largest epidemiological study of spondylodiscitis to date, spinal TB was significantly commoner in patients aged under 40 years compared with those over 40 (relative risk 2.7, 95% confidence interval 2.39–3.08).<sup>15</sup> This has also been observed in other series.<sup>17,38,80,81</sup> Extra-spinal TB may also be present in half of cases.<sup>41,81</sup>

*Kingella kingae* has emerged from being a previously poorly recognized cause of spondylodiscitis in children to the second commonest reported organism in some paediatric series.<sup>83,84</sup> Other rarities include *Actinomyces*, *Nocardia* and cat-scratch disease (in children).<sup>85,86</sup>

Fungal spondylodiscitis is uncommon even in large series (0.5%–1.6% usually, up to 6.9% in one report).<sup>18,24,43,58,87,88</sup> It is strongly associated with immunosuppression (including steroid use, neutropenia and chronic granulomatous disease).<sup>89–91</sup> *Candida* spp., *Aspergillus* spp. and *Cryptococcus neoformans* occur worldwide, whilst the dimorphic fungi *Coccidioides immitis* and *Blastomyces dermatitidis* are endemic in certain geographic areas.<sup>92</sup> *Candida albicans* is the commonest reported *Candida* species in the literature.<sup>91</sup> Risk factors for candidaemia are present in the majority of patients, particularly prior use of broad-spectrum antibiotics and central venous access devices.<sup>91</sup> Other secondary sites of infection are also commonly found (for example, endophthalmitis in 18%).

Parasitic infection, such as *Echinococcus* infection of the spine, has been reported as a cause and is extremely rare even in endemic areas.<sup>3</sup>

## Diagnosis

Diagnosis is based on clinical, laboratory and radiological features and can be difficult. It is often delayed or missed due to the rarity of the disease, the insidious onset of symptoms and the high frequency of low back pain in the general population. For instance, amongst 109 community-acquired *S. aureus* bacteraemia cases with vertebral osteomyelitis, the correct diagnosis was only formulated in 5% on admission to hospital, with any vertebral pathology entertained in 39% of the cases.<sup>26</sup>

## Clinical features

The symptoms of spondylodiscitis are non-specific. Back or neck pain is very common,<sup>22</sup> but up to 15% of patients may be pain-free.<sup>27,72</sup> The onset is usually insidious and ‘red flag’ features include constant pain that becomes worse at night. Radicular pain radiating to the chest or abdomen is not uncommon and may lead to misdiagnosis or even unnecessary surgery.<sup>26,93–95</sup>

Fever is less commonly experienced and occurs in only about half of patients,<sup>9,22</sup> and in one series only 14% (8 of 59 of cases).<sup>96</sup> Fever is less common in patients with TB spondylitis.<sup>46,50</sup> Neurological deficits, including leg weakness, paralysis, sensory deficit, radiculopathy and sphincter loss, are present in a third of cases.<sup>9</sup> These are more likely to be associated with epidural abscess, delayed diagnosis,<sup>88</sup> cervical lesions<sup>51,97,98</sup> and TB.<sup>38–40,82,99</sup> Risk factors for paralysis also include diabetes mellitus, advanced age and steroid use.<sup>98</sup>

Spinal deformities, predominantly kyphosis and gibbus formation, are commoner in tuberculous spondylitis.<sup>18,37,41</sup> Untreated chronic infections can progress to sinus formation,<sup>21,22</sup> a rare occurrence in recent case series. Cervical spondylodiscitis may manifest with dysphagia or torticollis.<sup>51,97</sup> Spinal tenderness is the commonest sign detected on examination, reported in 78–97% of cases,<sup>8,96,100</sup> often associated with restricted range of movement and paravertebral muscle spasm. A fluctuant mass may be present rarely and sciatic pain can often be elicited.<sup>22</sup>

In children, symptoms of spondylodiscitis are non-specific and include irritability, limping, refusal to crawl, sit or walk, hip pain or even abdominal pain.<sup>84,101–105</sup> Incontinence may be a presenting feature.<sup>101,104</sup> Fever is less common in young children with discitis compared with older children with vertebral osteomyelitis.<sup>101,102</sup> Loss of lumbar lordosis and lower back movement is the commonest sign on examination.<sup>102</sup> Compared with adults, children are less likely to have comorbidities and neurological deficits are uncommon.<sup>84</sup>

## Laboratory features

### Haematological and biochemical markers

Erythrocyte sedimentation rate (ESR) is a sensitive marker for infection but lacks specificity. In most reports, it is elevated in over 90% of cases, with mean values ranging from 43 mm/h to 87 mm/h.<sup>8,13,19,22,24,29,47,100,106</sup> No relation is found to the severity of the infection<sup>107</sup> or patient age.<sup>58</sup> Carragee and co-workers<sup>108</sup> investigated the ESR trend in predicting response after 1 month of conservative treatment. They found that a fall in ESR to below 25% of the presenting value was a good



prognostic marker: only 3/26 (12%) of cases were deemed clinical failures compared with 9/18 (50%) of those with no significant change in ESR. Thus, an unchanged or rising ESR was more difficult to interpret and the authors suggested evaluating this marker in conjunction with other parameters.

C-reactive protein (CRP) is similarly raised in the large majority of cases with spondylodiscitis.<sup>6,8,13,17,51</sup> In a study of 29 successfully treated patients, CRP had returned to normal in all survivors at 3 months follow-up.<sup>109</sup> Some authors suggest that CRP is the preferred marker for monitoring response to treatment.<sup>110</sup>

The leucocyte count is the least useful amongst the inflammatory markers; it is high in only a third to half of affected patients.<sup>8,13,17,19,22,24,29,47–49,51,100</sup> Carragee<sup>29</sup> noted that immunocompromised patients and those aged over 60 years were more likely to have a normal white cell count. However, age did not appear to affect leucocyte count in the study by Belzune-gui et al.<sup>58</sup> Other authors have noted an increase in neutrophil count in pyogenic when compared with tubercular or brucellar spondylitis.<sup>18,72</sup>

Approximately 70% of patients with spondylodiscitis may be anaemic<sup>17,19,49</sup> and about half have a raised alkaline phosphatase serum value.<sup>17,18</sup>

### Microbiological investigations

The value of obtaining a microbiological diagnosis cannot be overemphasized. The wide range of potential pathogens and the rise in antimicrobial resistance, both in hospital and the community, argues for the determination of the causative agent.<sup>111</sup> Empirical broad-spectrum antibiotic therapy is linked to increased rates of complications such as *Clostridium difficile*-associated diarrhoea and higher healthcare costs<sup>111</sup> and should be reserved for patients presenting with severe sepsis once blood cultures have been taken.

### Blood cultures

Blood culture is a simple and cost-effective method for identifying bacterial agents of spondylodiscitis, as the infection is mostly monomicrobial and often has a haematogenous source.<sup>112</sup> The yield from blood cultures varies between 40% and 60% in clinically defined cases of pyogenic spondylodiscitis.<sup>5,6,13,17,18,23,24,43,49</sup> The yield is lower in post-operative infections, where biopsy may be needed to confirm the diagnosis,<sup>6</sup> and higher with more virulent organisms and in the presence of pyrexia.<sup>22</sup> Discordant results between blood cultures and biopsy have been reported in one study, including polymicrobial results being missed by blood cultures.<sup>24</sup> In the presence of multiple positive blood cultures with Gram-positive organisms, concurrent infective endocarditis should be excluded.<sup>65,88</sup>

The use of the Ruiz-Castañedes biphasic blood culture system for the identification of *Brucella* has now been superseded by automated systems.<sup>73</sup> However, extended incubation for 4 weeks with regular subcultures is recommended.<sup>73,75</sup>

### Biopsy and culture

The frequency of performing biopsies (either open or percutaneous) varied among spondylodiscitis studies, ranging from 19 to 100%, and was often reserved for patients with negative

blood cultures.<sup>3,7,8,13,17,27,43,50,87</sup> Biopsy cultures from these series (some of which include tuberculous cases) were positive in 43%–78% of cases.<sup>3,5,7,13,17,18,43,50,87,113</sup> In one study, where all 101 patients underwent biopsy, the yield was 75%.<sup>3</sup>

The value of a percutaneous biopsy as a safe and minimally invasive intervention is well established.<sup>114–118</sup> Some experts recommend a second percutaneous biopsy if the first one is negative.<sup>36,119,120</sup> Friedman et al.<sup>48</sup> reported positive initial percutaneous spondylodiscitis, a frequency that improved to 79% on repeat biopsy. Other investigators would consider a negative percutaneous biopsy result as an indication for surgical biopsy, especially if the clinical progress is unsatisfactory.<sup>36,121</sup> Culture positivity is higher with surgical sampling,<sup>42,43</sup> even when minimally invasive techniques are used;<sup>122</sup> the diagnostic yield can be further improved by submitting more than one specimen for culture.<sup>123</sup> French guidelines recommend sending six biopsy samples.<sup>120</sup>

Biopsy yield is reduced by prior antibiotic use,<sup>63,116,117</sup> although as many as 39% of biopsy cultures in suspected cases of spondylodiscitis with no prior antibiotic exposure may be negative.<sup>124</sup>

The role of biopsy in children with spondylodiscitis is debated. Some investigators used it for the majority of their patients,<sup>84</sup> whilst others reserved it for cases that had not responded to empirical therapy or where mycobacterial or fungal agents were suspected.<sup>101,103–105</sup>

Biopsy material should undergo aerobic, anaerobic, fungal and mycobacterial cultures. Inoculation into enrichment broth should be considered for fastidious organisms; inoculation of biopsy material into blood culture bottles has been performed by some investigators,<sup>6,7</sup> but no comparative data exist to support this practice. Biopsy of other sites such as bone marrow may be helpful in brucellosis.<sup>125</sup>

### Histology

Histology is a valuable adjunct to culture<sup>63,113,116,118,124</sup> and can distinguish between pyogenic and granulomatous disease.<sup>7,41</sup> Special stains, such as Ziehl–Neelsen for mycobacteria and periodic acid–Schiff for fungi, can be helpful.<sup>89,90</sup> Unsuspected malignancy in proven or presumed cases of spondylodiscitis and vice versa is not uncommon, either due to diagnostic uncertainty or to the susceptibility of this group of patients to infection. This further emphasizes the need for both histological and microbiological analysis of biopsy samples.<sup>116</sup>

### Molecular diagnosis

Molecular diagnostic methods using broad-range 16S rDNA PCR have narrowed the diagnostic gap that existed with traditional culture-based methods, especially in the context of prior antibiotic usage or the presence of fastidious microorganisms.<sup>126,127</sup>

Comparisons of spinal biopsy cultures and 16S rDNA PCR have shown high concordance, with improved sensitivity conferred by the latter.<sup>64,128,129</sup> Species-specific PCR, particularly targeting *S. aureus*, can increase the sensitivity further with the additional benefit of providing methicillin susceptibility results by amplification of the *mecA* gene.<sup>64</sup> 16S rDNA PCR is inferior to culture at detecting mixed organisms due to preferential primer

binding.<sup>64</sup> The specificity of 16S rDNA PCR is high in carefully validated methodologies;<sup>64,128,130</sup> however, care should be used in interpreting all results when deciding on antibiotic treatment.<sup>127</sup> This is clearly a rapidly evolving field; at present, the role of these methods should be mainly considered as a valuable adjunct to standard cultures.

## Serology

Serology should be performed for suspected cases of *Brucella*<sup>73</sup> or *Bartonella henselae* infection (particularly in children with cat exposure).<sup>85,86,101,120</sup>

Staphylococcal serology has been used, particularly in older case series,<sup>14,107,111</sup> and has a reported sensitivity of 80% when anti-alpha- and anti-gamma-haemolysin tests are combined.<sup>131</sup> Nevertheless, its value has been questioned.<sup>132</sup> Antigen-based tests such as the cryptococcal antigen test should be considered when invasive fungal infection is likely.

## Radiology

Plain radiography has a reported sensitivity of 82%, specificity of 57% and accuracy of 73%.<sup>133</sup> It is frequently employed as a screening test and may reveal early changes such as subchondral radiolucency, loss of definition of the endplate and loss of disc height.<sup>14,134,135</sup> Later changes include destruction of the opposite endplate, loss of vertebral height and paravertebral soft tissue mass.<sup>135</sup> However, changes tend to appear 2–8 weeks after onset of symptoms<sup>25</sup> and false positive results can occur due to degenerative change.<sup>133</sup>

A variety of tracers have been used in the radionuclide imaging of spondylodiscitis.<sup>136</sup> Technetium-99m-methylene diphosphonate bone scintigraphy has a reported sensitivity of 90%, but a poorer specificity of 78%, degenerative changes resulting in false positive results.<sup>133</sup> Gallium-67 scintigraphy is a valuable adjunct to bone scan,<sup>137</sup> and when combined they have a sensitivity of 90%, a specificity of 100% and accuracy of 94%.<sup>133</sup> The use of indium-111-leucocyte scan is not recommended due to poor sensitivity, spondylodiscitis lesions often displaying non-specific photopenic regions.<sup>138</sup>

Fluorine-18 fluorodeoxyglucose positron emission tomography (FDG-PET) is showing promise as a very sensitive modality.<sup>139</sup> It can effectively distinguish infection from degenerative changes even when magnetic resonance imaging (MRI) is inconclusive,<sup>140</sup> although it shows a low specificity for neoplasms.<sup>139</sup>

Computed tomography (CT) is the best modality at delineating bony abnormalities, including early endplate destruction (before they become visible on X-ray), later sequestra or involucra formation, or pathological calcification suggestive of TB.<sup>135</sup> It is inferior to MRI in imaging neural tissue and abscesses. Disc changes appear as hypodense areas. CT is currently mostly used for the radiological guidance of spinal biopsy.<sup>114,117,118</sup>

MRI is considered the modality of choice for the radiological diagnosis of spondylodiscitis.<sup>35,133,141,142</sup> It has a reported sensitivity of 96%, specificity of 93% and accuracy of 94%.<sup>133</sup> Its advantage over other modalities lies with its superior ability to provide anatomical information, particularly relating to the epidural space and spinal cord.<sup>133</sup> The characteristic changes consist of decreased signal intensity from disc and adjacent vertebral bodies on T1-weighted images, increased signal intensity

on T2-weighted images (due to oedema) and loss of endplate definition on T1 weighting.<sup>133</sup> Gadolinium enhancement of discs, vertebrae and surrounding soft tissues improves the accuracy of MRI, particularly in early infections when other changes may be subtle,<sup>143,144</sup> and also helps to differentiate infective lesions from degenerative changes (Modic type 1 abnormalities) or neoplasms.<sup>141</sup> TB spinal infection is suggested by a lack of disc involvement (which may cause confusion with neoplasms) and the presence of large paraspinal abscesses, posterior vertebral changes, meningeal enhancement and involvement of multiple non-contiguous levels with greater vertebral bone destruction.<sup>35,37,135,145,146</sup>

In pyogenic spondylodiscitis, emerging evidence suggests that some MRI changes commonly persist or even worsen during treatment despite clinical improvement<sup>8,109,147–150</sup> and may result in unnecessary surgery.<sup>147</sup> Reliable markers of resolution of infection, such as bony restoration and complete loss of gadolinium enhancement, appear very late in the healing process.<sup>148</sup> Re-imaging in the critical period of 4–8 weeks of treatment showed increased loss of disc height, and often persistent or worsening vertebral body and disc enhancement.<sup>150</sup> MRI signs that often showed improvement include the presence of epidural enhancement, epidural abscess or spinal canal encroachment, but none was associated with the patients' clinical status.<sup>150</sup> Amongst 21 patients with improved soft tissue MRI features, only one experienced treatment failure whilst most patients with worse appearances did not.<sup>149,150</sup>

Similar to pyogenic cases, MRI changes lag behind clinical improvement in tuberculous spondylitis and abnormalities can persist past successful completion of treatment.<sup>40,80,81</sup>

A summary of the non-specific factors that may help in the differentiation of pyogenic, brucellar and tuberculous spinal infections is shown in Table 1.

## Treatment

### Medical management

The aim of treatment is to eradicate the infection, restore and preserve the structure and function of the spine, and alleviate pain. Conservative management consists of antimicrobial therapy and non-pharmacological treatments such as physiotherapy and immobilization. Immobilization is advocated when pain is significant or there is a risk of spinal instability.<sup>151</sup>

Since the advent of antibiotics, mortality has dropped from 25%–56%<sup>2,152</sup> to less than 5%.<sup>22</sup> However, randomized trials to guide the selection of the appropriate route, duration or agent for antibiotic therapy are lacking. Practice is based on retrospective case series, expert opinion and data extrapolated from animal and laboratory data.

### Treatment initiation, route of administration and duration

Whilst initial antimicrobial therapy is almost always administered parenterally, its duration varies considerably. In a multicentre observational prospective study, the mean treatment duration was 14.7 weeks with minimum length ranging from 6 to 12 weeks according to treating centre.<sup>5</sup> Positive blood cultures, neurological abnormalities and staphylococcal infections

**Table 1.** Comparative features between pyogenic, tuberculous and brucellar vertebral infections that may help differentiation (histological and microbiological features not included).

| Diagnostic parameters | Pyogenic                                                                                                                                                                | Tuberculous                                                                                                                                                                                             | Brucellar                                                                                                                                                |
|-----------------------|-------------------------------------------------------------------------------------------------------------------------------------------------------------------------|---------------------------------------------------------------------------------------------------------------------------------------------------------------------------------------------------------|----------------------------------------------------------------------------------------------------------------------------------------------------------|
| History               | recent distant bacterial infection<br><br>recent GU surgery or iv access devices<br><br>previous spinal surgery<br>DM, IVDU, chronic debilitation,<br>immunosuppression | history of TB infection or current extraspinal manifestations<br>originating from countries with high TB incidence                                                                                      | history of <i>Brucella</i> infection<br><br>travel to endemic country, rural areas, consumption of unpasteurized products, occupational history          |
| Onset                 | acute or subacute                                                                                                                                                       | subacute                                                                                                                                                                                                | acute or subacute                                                                                                                                        |
| Clinical findings     | pyrexia more common<br>acute sepsis                                                                                                                                     | gibbus deformity more common<br>pyrexia less common                                                                                                                                                     | gibbus deformity rare                                                                                                                                    |
| Laboratory findings   | CRP, ESR, WCC higher, particularly in acutely septic patients                                                                                                           | WCC less helpful                                                                                                                                                                                        | WCC less helpful<br><br>CRP, ESR less elevated                                                                                                           |
| CT/MRI                | usually lumbar spine<br><br>disc with neighbouring vertebrae affected<br>anterior part of vertebra (except post surgery)                                                | CRP, ESR less elevated<br>usually thoracic and/or lumbar spine<br>multiple segments<br>disc may be spared<br>posterior vertebral elements affected<br>large paraspinal/psoas abscesses<br>calcification | usually lumbar spine<br><br>'parrot beak' osteophytes<br>vertebral collapse and spinal cord compression are rare<br>anterior superior end plate affected |

GU, genitourinary; IV, intravenous; DM, diabetes mellitus; IVDU, intravenous drug user; CRP, C-reactive protein; ESR, erythrocyte sedimentation rate; WCC, white cell count; CT/MRI, computed tomography/magnetic resonance imaging.

(compared with negative microbiology) were associated with longer intravenous courses.<sup>5</sup> Other studies showed a median total treatment duration ranging from 6 to 14.7 weeks,<sup>5,23,47,49,52,153,154</sup> with parenteral treatment lasting between 3 and 8 weeks.<sup>3,5,23,52,153</sup>

Sapico and Montgomerie<sup>22</sup> found a significantly increased risk of treatment failure in patients treated for a total of less than 4 weeks compared with those treated for longer (3 of 7 patients versus 1 of 26 patients respectively). In a retrospective study of 120 patients, no difference in the risk of relapse was found amongst patients treated for  $\leq 6$  versus  $> 6$  weeks.<sup>155</sup> However, the patients treated for more than 6 weeks were older and had higher ESR values and blood culture positivity rates. French guidelines recommend a minimum treatment duration of 6–12 weeks.<sup>120</sup>

Outpatient parenteral antimicrobial therapy (OPAT) is cost-effective<sup>156</sup> and has been used successfully in cases of osteomyelitis; however, data specifically for spondylodiscitis are limited.<sup>157</sup> Once daily anti-staphylococcal agents such as ceftriaxone, teicoplanin and daptomycin may be particularly suited for outpatient or home administration.

Criteria for discontinuation of antimicrobial treatment include symptom resolution or improvement and the normalization of ESR or CRP.<sup>5,43</sup> It has been proposed that a weekly decrease in CRP by 50% represents adequate progress.<sup>132</sup> The role of follow-on oral therapy is not established but treatment has been successful with early oral conversion after as little as 10 days of parenteral treatment.<sup>17</sup> Oral agents should have high bioavailability and possible options include fluoroquinolones, clindamycin, rifampicin and fusidic acid.<sup>158</sup> Early oral conversion should be avoided until endocarditis has been excluded.<sup>88</sup>

### Antibiotic choice—empirical and targeted therapy

Empirical therapy should cover *S. aureus* and Gram-negative organisms, taking into account local susceptibility rates and the likelihood of colonization with resistant organisms.

Most data on antibiotic bone penetration in humans relates to synovial fluid and long bones.<sup>119,158</sup> Antibiotic penetration of  $\beta$ -lactams into healthy human and animal vertebral discs is disappointing,<sup>159–161</sup> whilst clindamycin, aminoglycosides and glycopeptides penetrate well into discs in animals. The clinical relevance of these observations is unclear in the context of an infection.

Guidelines exist for the treatment of osteomyelitis caused by TB,<sup>162,163</sup> brucellosis,<sup>164</sup> MRSA,<sup>165,166</sup> *Candida*,<sup>167</sup> *Aspergillus*<sup>168</sup> and dimorphic fungi.<sup>169,170</sup> In these, distinction between osteomyelitis affecting the vertebrae and other bones is not always attempted.

Table 2 shows some suggested regimens according to causative organism.

### Role of combination antibiotic therapy

The role of adjunctive agents for the treatment of *S. aureus* vertebral infections is not clear. Fusidic acid use in combination with  $\beta$ -lactam antibiotics, macrolides or rifampicin has been reported in a few studies, but the small case numbers and non-comparative nature of the data preclude any firm conclusions.<sup>171</sup> The largest observational study to report the use of fusidic acid in combination with a penicillinase-stable penicillin found it was

associated with significantly lower recurrence rates compared with  $\beta$ -lactam monotherapy (5% versus 20%).<sup>26</sup>

A systematic review of the adjunctive use of rifampicin concluded that it offered a benefit, especially in the treatment of prosthetic device and bone infections.<sup>172</sup> However, the studies excluded<sup>173–175</sup> or did not provide information on cases with vertebral osteomyelitis.<sup>176,177</sup> In a series of haematogenous *S. aureus* spondylodiscitis, cured patients were more likely to have received more than 2 weeks of adjunctive rifampicin compared with patients who relapsed (15 of 30 cases versus 0 of 5 cases respectively). However, this trend did not reach statistical significance.<sup>178</sup> A subsequent study of pyogenic spondylodiscitis addressed the empirical use of a quinolone (levofloxacin) and rifampicin,<sup>179</sup> a combination considered effective in treating prosthetic device osteomyelitis.<sup>175,180</sup> This combination was effective in 77% (37 of 48 cases), rising to 96% (26 of 27 cases) in infection due to confirmed levofloxacin-susceptible organisms (including all 19 *S. aureus* isolates).<sup>179</sup> The efficacy was thought to be related, in part, to quinolone therapeutic drug monitoring, a practice also advocated by others.<sup>158</sup> Combinations of quinolone and rifampicin should be used with caution in cases lacking a definitive microbiological diagnosis where TB remains in the differential diagnosis, or where quinolone-resistant Gram-positive organisms (for example MRSA) are prevalent.<sup>165</sup>

The adjunctive use of aminoglycosides is recommended and used in French studies,<sup>119,120,155,158</sup> though this is not supported by clinical evidence and may impair renal function.<sup>181</sup>

### New antimicrobial agents

The new anti-staphylococcal agents linezolid, daptomycin and tigecycline are not licensed for use in osteomyelitis. Promising data on daptomycin use in bone infections (including multiple cases of spondylodiscitis) were reported in a recent systematic review of uncontrolled case series.<sup>182</sup> In a *post hoc* analysis of an open-label prospective trial of daptomycin versus standard therapy in 246 patients with *S. aureus* bacteraemia, 9 cases of vertebral osteomyelitis (3.5%) were identified.<sup>183</sup> Daptomycin (6 mg/kg daily) was successful in 4 of 6 patients compared with 1 of 3 treated with standard therapy.<sup>183</sup> However, the emergence of resistance on treatment is cause for concern (particularly in isolates with reduced susceptibility to glycopeptides).<sup>182</sup>

Linezolid has good penetration into bone and excellent oral bioavailability, characteristics that are desirable in the treatment of bone infections.<sup>184</sup> In a compassionate use programme, 8 of 55 (15%) patients with bone infections had vertebral osteomyelitis. Of these, four were cured, one was considered a treatment failure and three were non-evaluable.<sup>184</sup> The major concern about the use of linezolid in the treatment of spondylodiscitis pertains to its potentially serious side effect profile related to extended treatment courses.<sup>184</sup>

Tigecycline has been used in an experimental model of long-bone osteomyelitis.<sup>185</sup> To our knowledge, no clinical case of spondylodiscitis treated with tigecycline has been described in the literature. Clearly, more data from well-designed trials are needed.

### Challenge of increasing resistance

Although MRSA bacteraemia rates in the UK are continuing to decline, the reduced efficacy of vancomycin therapy for MRSA

**Table 2.** Suggested antimicrobial regimens according to causative organism and susceptibilities

| Organism                                  | Treatment regimen                                                                                                                                                                                                                     |
|-------------------------------------------|---------------------------------------------------------------------------------------------------------------------------------------------------------------------------------------------------------------------------------------|
| <i>S. aureus</i>                          |                                                                                                                                                                                                                                       |
| Methicillin-susceptible                   | Flucloxacillin 2 g q6h iv or equivalent anti-staphylococcal penicillin OR<br>Ceftriaxone 2 g daily iv                                                                                                                                 |
| Methicillin-resistant                     | Vancomycin 15–20 mg/kg q12h–q8h iv aiming for pre-dose levels of 15–20 mg/L OR<br>Teicoplanin 12 mg/kg daily iv after loading                                                                                                         |
| Enterobacteriaceae                        | Ciprofloxacin 400 mg q12h iv or 750 mg q12h orally OR<br>Ceftriaxone 2 g daily iv OR<br>Meropenem 1 g q8h iv                                                                                                                          |
| <i>P. aeruginosa</i>                      | Ceftazidime 2 g q8h iv ± aminoglycosides OR<br>Meropenem 1 g q8h iv ± aminoglycosides OR<br>Ciprofloxacin 400 mg q12h iv or 750 mg q12h orally (useful as continuation therapy)<br>OR combination of two different antibiotic classes |
| Streptococci                              | Benzylpenicillin 2.4 g q6h iv OR<br>Ceftriaxone 2 g once daily iv                                                                                                                                                                     |
| Enterococci                               |                                                                                                                                                                                                                                       |
| <i>E. faecalis</i>                        | Amoxicillin 2 g q6h iv ± gentamicin 1 mg/kg q12h–q8h iv                                                                                                                                                                               |
| <i>E. faecium</i>                         | Vancomycin 15 mg/kg q12h iv ± gentamicin 1 mg/kg q12h–q8h iv                                                                                                                                                                          |
| Anaerobes                                 | Metronidazole 500 mg q8h iv OR<br>Clindamycin 450 mg q6h orally                                                                                                                                                                       |
| <i>Brucella</i> <sup>164</sup>            | Doxycycline 100 mg q12h orally with streptomycin 15 mg/kg daily im for first 2–3 weeks OR<br>Doxycycline 100 mg q12h orally and rifampicin 600–900 mg daily orally                                                                    |
| <i>Kingella kingae</i>                    | Ceftriaxone 2 g daily iv                                                                                                                                                                                                              |
| <i>M. tuberculosis</i> <sup>162,163</sup> | Isoniazid and rifampicin, with pyrazinamide and ethambutol for the first 2 months                                                                                                                                                     |
| <i>Candida</i> spp. <sup>167</sup>        | Fluconazole 400 mg (6 mg/kg) daily iv OR<br>Liposomal amphotericin B 3–5 mg/kg daily iv OR<br>an echinocandin                                                                                                                         |
| <i>Aspergillus</i> <sup>168</sup>         | Voriconazole 6 mg/kg q12h iv loading for two doses, followed by 4 mg/kg q12h iv OR<br>Liposomal amphotericin B 3–5 mg/kg daily iv                                                                                                     |

q6h, every 6 h; q8h, every 8 h; q12h every 12 h; iv, intravenous; im, intramuscular  
All regimens assume lack of allergy or other contraindications to the recommended agents. Dosages given are for adults with normal renal function. The recommendations are based on local practice (except where reference included).

isolates with vancomycin MIC values of 2 mg/L and above is of concern.<sup>186</sup> To ensure therapeutic vancomycin levels are achieved within infected bone, the Infectious Diseases Society of America (IDSA) guidelines recommend maintaining trough vancomycin concentrations of 15–20 mg/L.<sup>186</sup> It is unclear if adding a second anti-staphylococcal agent or employing a newer agent may be beneficial; this merits further investigation. A French study has highlighted the growing concern regarding drug-resistant tuberculous infection, with 9% of isolates being resistant to at least one first-line agent.<sup>82</sup>

**Surgical management**

Indications for surgical intervention include compression of neural elements, spinal instability due to extensive bony destruction, severe kyphosis, or failure of conservative management.<sup>12,110,151,187,188</sup> Some also advocate surgery in the

presence of intractable pain.<sup>44,187,189</sup> Most, but not all, authors consider the presence of epidural abscess as an indication for surgery, even in the absence of neurological deficits.<sup>190</sup> Radiologically guided percutaneous drainage offers an effective alternative to surgery in the management of paravertebral and intradiscal abscesses.<sup>191</sup> However, a more conservative approach in neurologically intact patients is increasingly used with success and has been advocated provided a microbiological diagnosis is available.<sup>8,192</sup> In such cases, close monitoring is imperative given the risk of sudden neurological deterioration.<sup>190</sup>

Spinal cord compression is a surgical emergency. Outcomes are worse if paralysis has been present for over 24–36 h, when a surgical procedure may be futile.<sup>190</sup> However, some investigators have reported improvement in neurological status following decompression even in patients with prolonged paralysis.<sup>98,153</sup>

A variety of surgical approaches exist and selection depends on patient characteristics and local surgical experience. An



anterior approach is preferred as it allows improved visualization of the part of the spine most commonly affected. Posterior decompression by laminectomy should be reserved for isolated primary epidural abscesses and is contraindicated in spondylodiscitis because of the risk of spinal instability.<sup>3,98,193</sup> Anterior decompression with either an autologous bone graft or a titanium cage to fill the defect caused by debridement has been described.<sup>3,151,187</sup> A more recent approach reports the use of recombinant human bone morphogenetic protein.<sup>194</sup>

Minimally invasive techniques are technically demanding but offer good results in early infection.<sup>3</sup> Percutaneous transpedicular discectomy and drainage resulted in immediate relief of pain in 76% cases.<sup>195</sup>

## Outcome

The attributable mortality of spondylodiscitis has been reported as less than 5%, ranging from 0 to 11%.<sup>5,17,18,27,43,48,96,100</sup> Early mortality is related to uncontrolled sepsis.<sup>13,27</sup> The most feared complication is disability due to residual neurological deficit or severe pain, occurring in as many as a third of cases.<sup>3,18,43,196</sup> Relapse rates cannot be accurately determined as the duration of follow-up is not adequate in most series. Recrudescence of infection is known to occur even years after the original insult was treated. In a series of 253 patients followed up for a median of 6.5 years, relapse was documented in 14%. Three-quarters occurred within the first year, the timing ranging from less than 1 month to as long as 12 years post treatment.<sup>43</sup> On multivariate analysis, relapse was associated with recurrent bacteraemia, the presence of a chronically draining sinus and paravertebral abscess. Relapse should be considered in any patient with recurrent pain, unexplained fever, bacteraemia, weight loss or rising ESR.

Independent risk factors for adverse outcome, defined as death or disability, included a delay in diagnosis greater than 2 months, paralysis or motor weakness, and hospital acquisition.<sup>43</sup> In one large series, brucellar infections were associated with serious sequelae less frequently than pyogenic and tuberculous cases.<sup>18</sup>

Childhood spondylodiscitis has an excellent prognosis.<sup>84,102,103,105</sup> In the largest reported series, which included 42 patients, 37 had no functional sequelae, three had pain only on sporting activities, and only one patient had long-term neurological sequelae.<sup>84</sup> In the study with the longest follow-up data (minimum 10 years post infection), 80% (16 of 20 patients) were completely asymptomatic, whilst 20% had restricted spinal movement.<sup>103</sup>

## Conclusion

Spondylodiscitis remains rare but its incidence is rising, due to an increasingly susceptible population and the availability of more effective diagnostic tools. A high index of suspicion is needed for prompt diagnosis to ensure improved long-term outcomes. A microbiological diagnosis is essential to enable appropriate choice of therapeutic agents. Randomized trials are needed to assess the optimal treatment duration, route of administration, and the role of combination therapy and newer agents.

Surgery has an important role in alleviating pain, correcting deformities and neural compromise and restoring function.

## Transparency declaration

This article is part of a Supplement sponsored by the BSAC.

N. M. B. has received lecture honoraria, consultancy fees or sponsorship to attend conferences from a number of pharmaceutical companies, including Gilead Sciences, Astra Zeneca, Pfizer, Janssen Cilag, Merck Sharp & Dohme and Wyeth. S. H. A. has received sponsorship to attend conferences from Gilead Sciences, Schering Plough and Wyeth. T. G. has no conflicts of interest to declare.

## References

- 1 Tayles N, Buckley HR. Leprosy and tuberculosis in Iron Age Southeast Asia? *Am J Phys Anthropol* 2004; **125**: 239–56.
- 2 Kulowski J. Pyogenic osteomyelitis of the spine: an analysis and discussion of 102 cases. *J Bone Joint Surg Am* 1936; **18**: 343–64.
- 3 Hadjipavlou AG, Mader JT, Necessary JT et al. Hematogenous pyogenic spinal infections and their surgical management. *Spine (Phila Pa 1976)* 2000; **25**: 1668–79.
- 4 Calderone RR, Larsen JM. Overview and classification of spinal infections. *Orthop Clin North Am* 1996; **27**: 1–8.
- 5 Legrand E, Flipo RM, Guggenbuhl P et al. Management of nontuberculous infectious discitis. Treatments used in 110 patients admitted to 12 teaching hospitals in France. *Joint Bone Spine* 2001; **68**: 504–9.
- 6 Dufour V, Feydy A, Rillardon L et al. Comparative study of postoperative and spontaneous pyogenic spondylodiscitis. *Semin Arthritis Rheum* 2005; **34**: 766–71.
- 7 Turunc T, Demiroglu YZ, Uncu H et al. A comparative analysis of tuberculous, brucellar and pyogenic spontaneous spondylodiscitis patients. *J Infect* 2007; **55**: 158–63.
- 8 Euba G, Narvaez JA, Nolla JM et al. Long-term clinical and radiological magnetic resonance imaging outcome of abscess-associated spontaneous pyogenic vertebral osteomyelitis under conservative management. *Semin Arthritis Rheum* 2008; **38**: 28–40.
- 9 Mylona E, Samarkos M, Kakalou E et al. Pyogenic vertebral osteomyelitis: a systematic review of clinical characteristics. *Semin Arthritis Rheum* 2009; **39**: 10–7.
- 10 Jensen AG, Espersen F, Skinhoj P et al. Increasing frequency of vertebral osteomyelitis following *Staphylococcus aureus* bacteraemia in Denmark 1980–1990. *J Infect* 1997; **34**: 113–8.
- 11 Espersen F, Frimodt-Moller N, Thømdrup Rosdahl V et al. Changing pattern of bone and joint infections due to *Staphylococcus aureus*: study of cases of bacteremia in Denmark, 1959–1988. *Rev Infect Dis* 1991; **13**: 347–58.
- 12 Sobottke R, Seifert H, Fatkenheuer G et al. Current diagnosis and treatment of spondylodiscitis. *Dtsch Arztebl Int* 2008; **105**: 181–7.
- 13 Chelsom J, Solberg CO. Vertebral osteomyelitis at a Norwegian university hospital 1987–97: clinical features, laboratory findings and outcome. *Scand J Infect Dis* 1998; **30**: 147–51.
- 14 Digby JM, Kersley JB. Pyogenic non-tuberculous spinal infection: an analysis of thirty cases. *J Bone Joint Surg Br* 1979; **61**: 47–55.
- 15 Grammatico L, Baron S, Rusch E et al. Epidemiology of vertebral osteomyelitis (VO) in France: analysis of hospital-discharge data 2002–2003. *Epidemiol Infect* 2008; **136**: 653–60.

- 16 Krogsgaard MR, Wagn P, Bengtsson J. Epidemiology of acute vertebral osteomyelitis in Denmark: 137 cases in Denmark 1978–1982, compared to cases reported to the National Patient Register 1991–1993. *Acta Orthop Scand* 1998; **69**: 513–7.
- 17 Beronius M, Bergman B, Andersson R. Vertebral osteomyelitis in Goteborg, Sweden: a retrospective study of patients during 1990–95. *Scand J Infect Dis* 2001; **33**: 527–32.
- 18 Colmenero JD, Jimenez-Mejias ME, Sanchez-Lora FJ et al. Pyogenic, tuberculous, and brucellar vertebral osteomyelitis: a descriptive and comparative study of 219 cases. *Ann Rheum Dis* 1997; **56**: 709–15.
- 19 Hopkinson N, Stevenson J, Benjamin S. A case ascertainment study of septic discitis: clinical, microbiological and radiological features. *QJM* 2001; **94**: 465–70.
- 20 Joughin E, McDougall C, Parfitt C et al. Causes and clinical management of vertebral osteomyelitis in Saskatchewan. *Spine (Phila Pa 1976)* 1991; **16**: 261–4.
- 21 Malawski SK, Lukawski S. Pyogenic infection of the spine. *Clin Orthop Relat Res* 1991; **272**: 58–66.
- 22 Sapico FL, Montgomerie JZ. Pyogenic vertebral osteomyelitis: report of nine cases and review of the literature. *Rev Infect Dis* 1979; **1**: 754–76.
- 23 Musher DM, Thorsteinsson SB, Minuth JN et al. Vertebral osteomyelitis. Still a diagnostic pitfall. *Arch Intern Med* 1976; **136**: 105–10.
- 24 Patzakis MJ, Rao S, Wilkins J et al. Analysis of 61 cases of vertebral osteomyelitis. *Clin Orthop Relat Res* 1991; **264**: 178–83.
- 25 Waldvogel FA, Papageorgiou PS. Osteomyelitis: the past decade. *N Engl J Med* 1980; **303**: 360–70.
- 26 Jensen AG, Espersen F, Skinhoj P et al. Bacteremic *Staphylococcus aureus* spondylitis. *Arch Intern Med* 1998; **158**: 509–17.
- 27 Torda AJ, Gottlieb T, Bradbury R. Pyogenic vertebral osteomyelitis: analysis of 20 cases and review. *Clin Infect Dis* 1995; **20**: 320–8.
- 28 Deyo RA, Nachemson A, Mirza SK. Spinal-fusion surgery—the case for restraint. *N Engl J Med* 2004; **350**: 722–6.
- 29 Carragee EJ. Pyogenic vertebral osteomyelitis. *J Bone Joint Surg Am* 1997; **79**: 874–80.
- 30 Ratcliffe JF. An evaluation of the intra-osseous arterial anastomoses in the human vertebral body at different ages. A microarteriographic study. *J Anat* 1982; **134**: 373–82.
- 31 Wiley AM, Trueta J. The vascular anatomy of the spine and its relationship to pyogenic vertebral osteomyelitis. *J Bone Joint Surg Br* 1959; **41-B**: 796–809.
- 32 Ratcliffe JF. Anatomic basis for the pathogenesis and radiologic features of vertebral osteomyelitis and its differentiation from childhood discitis. A microarteriographic investigation. *Acta Radiol Diagn (Stockh)* 1985; **26**: 137–43.
- 33 Babinchak TJ, Riley DK, Rotheram EB Jr. Pyogenic vertebral osteomyelitis of the posterior elements. *Clin Infect Dis* 1997; **25**: 221–4.
- 34 Govender S, Mutasa E, Parbhoo AH. Cryptococcal osteomyelitis of the spine. *J Bone Joint Surg Br* 1999; **81**: 459–61.
- 35 Maiuri F, Iaconetta G, Gallicchio B et al. Spondylodiscitis. Clinical and magnetic resonance diagnosis. *Spine (Phila Pa 1976)* 1997; **22**: 1741–6.
- 36 Sapico FL, Montgomerie JZ. Vertebral osteomyelitis. *Infect Dis Clin North Am* 1990; **4**: 539–50.
- 37 Chang MC, Wu HT, Lee CH et al. Tuberculous spondylitis and pyogenic spondylitis: comparative magnetic resonance imaging features. *Spine (Phila Pa 1976)* 2006; **31**: 782–8.
- 38 Turgut M. Spinal tuberculosis (Pott's disease): its clinical presentation, surgical management, and outcome. A survey study on 694 patients. *Neurosurg Rev* 2001; **24**: 8–13.
- 39 Godlwana L, Gounden P, Ngubo P et al. Incidence and profile of spinal tuberculosis in patients at the only public hospital admitting such patients in KwaZulu-Natal. *Spinal Cord* 2008; **46**: 372–4.
- 40 Le Page L, Feydy A, Rillardon L et al. Spinal tuberculosis: a longitudinal study with clinical, laboratory, and imaging outcomes. *Semin Arthritis Rheum* 2006; **36**: 124–9.
- 41 Buchelt M, Lack W, Kutschera HP et al. Comparison of tuberculous and pyogenic spondylitis. An analysis of 122 cases. *Clin Orthop Relat Res* 1993; **296**: 192–9.
- 42 Jimenez-Mejias ME, de Dios Colmenero J, Sanchez-Lora FJ et al. Postoperative spondylodiscitis: etiology, clinical findings, prognosis, and comparison with nonoperative pyogenic spondylodiscitis. *Clin Infect Dis* 1999; **29**: 339–45.
- 43 McHenry MC, Easley KA, Locker GA. Vertebral osteomyelitis: long-term outcome for 253 patients from 7 Cleveland-area hospitals. *Clin Infect Dis* 2002; **34**: 1342–50.
- 44 Rezai AR, Woo HH, Errico TJ et al. Contemporary management of spinal osteomyelitis. *Neurosurgery* 1999; **44**: 1018–25; discussion 25–6.
- 45 Weinstein MA, Eismont FJ. Infections of the spine in patients with human immunodeficiency virus. *J Bone Joint Surg Am* 2005; **87**: 604–9.
- 46 Belzunegui J, Del Val N, Intxausti JJ et al. Vertebral osteomyelitis in northern Spain. Report of 62 cases. *Clin Exp Rheumatol* 1999; **17**: 447–52.
- 47 Butler JS, Shelly MJ, Timlin M et al. Nontuberculous pyogenic spinal infection in adults: a 12-year experience from a tertiary referral center. *Spine (Phila Pa 1976)* 2006; **31**: 2695–700.
- 48 Friedman JA, Maher CO, Quast LM et al. Spontaneous disc space infections in adults. *Surg Neurol* 2002; **57**: 81–6.
- 49 Nather A, David V, Hee HT et al. Pyogenic vertebral osteomyelitis: a review of 14 cases. *J Orthop Surg (Hong Kong)* 2005; **13**: 240–4.
- 50 Perronne C, Saba J, Behloul Z et al. Pyogenic and tuberculous spondylodiscitis (vertebral osteomyelitis) in 80 adult patients. *Clin Infect Dis* 1994; **19**: 746–50.
- 51 Schimmer RC, Jeanneret C, Nunley PD et al. Osteomyelitis of the cervical spine: a potentially dramatic disease. *J Spinal Disord Tech* 2002; **15**: 110–7.
- 52 Osenbach RK, Hitchon PW, Menezes AH. Diagnosis and management of pyogenic vertebral osteomyelitis in adults. *Surg Neurol* 1990; **33**: 266–75.
- 53 Fowler VG Jr, Olsen MK, Corey GR et al. Clinical identifiers of complicated *Staphylococcus aureus* bacteremia. *Arch Intern Med* 2003; **163**: 2066–72.
- 54 Fowler VG Jr, Justice A, Moore C et al. Risk factors for hematogenous complications of intravascular catheter-associated *Staphylococcus aureus* bacteremia. *Clin Infect Dis* 2005; **40**: 695–703.
- 55 Al-Nammari SS, Lucas JD, Lam KS. Hematogenous methicillin-resistant *Staphylococcus aureus* spondylodiscitis. *Spine (Phila Pa 1976)* 2007; **32**: 2480–6.
- 56 Martinez-Aguilar G, Avalos-Mishaan A, Hulten K et al. Community-acquired, methicillin-resistant and methicillin-susceptible *Staphylococcus aureus* musculoskeletal infections in children. *Pediatr Infect Dis J* 2004; **23**: 701–6.
- 57 Arnold SR, Elias D, Buckingham SC et al. Changing patterns of acute hematogenous osteomyelitis and septic arthritis: emergence of community-associated methicillin-resistant *Staphylococcus aureus*. *J Pediatr Orthop* 2006; **26**: 703–8.
- 58 Belzunegui J, Intxausti JJ, De Dios JR et al. Haematogenous vertebral osteomyelitis in the elderly. *Clin Rheumatol* 2000; **19**: 344–7.
- 59 Chang IC. Salmonella spondylodiscitis in patients without sickle cell disease. *Clin Orthop Relat Res* 2005; **430**: 243–7.

- 60 Chuo CY, Fu YC, Lu YM et al. Spinal infection in intravenous drug abusers. *J Spinal Disord Tech* 2007; **20**: 324–8.
- 61 Bucher E, Trampuz A, Donati L et al. Spondylodiscitis associated with bacteraemia due to coagulase-negative staphylococci. *Eur J Clin Microbiol Infect Dis* 2000; **19**: 118–20.
- 62 Le Moal G, Roblot F, Paccalin M et al. Clinical and laboratory characteristics of infective endocarditis when associated with spondylodiscitis. *Eur J Clin Microbiol Infect Dis* 2002; **21**: 671–5.
- 63 de Lucas EM, Gonzalez Mandly A, Gutierrez A et al. CT-guided fine-needle aspiration in vertebral osteomyelitis: true usefulness of a common practice. *Clin Rheumatol* 2009; **28**: 315–20.
- 64 Lecouvet F, Irenge L, Vandercam B et al. The etiologic diagnosis of infectious discitis is improved by amplification-based DNA analysis. *Arthritis Rheum* 2004; **50**: 2985–94.
- 65 Mulleman D, Philippe P, Senneville E et al. Streptococcal and enterococcal spondylodiscitis (vertebral osteomyelitis). High incidence of infective endocarditis in 50 cases. *J Rheumatol* 2006; **33**: 91–7.
- 66 Turner DP, Weston VC, Ispahani P. *Streptococcus pneumoniae* spinal infection in Nottingham, United Kingdom: not a rare event. *Clin Infect Dis* 1999; **28**: 873–81.
- 67 Taylor SN, Sanders CV. Unusual manifestations of invasive pneumococcal infection. *Am J Med* 1999; **107**: 125–27S.
- 68 Uckay I, Dinh A, Vauthey L et al. Spondylodiscitis due to *Propionibacterium acnes*: report of twenty-nine cases and a review of the literature. *Clin Microbiol Infect* 2010; **16**: 353–8.
- 69 Saeed MU, Mariani P, Martin C et al. Anaerobic spondylodiscitis: case series and systematic review. *South Med J* 2005; **98**: 144–8.
- 70 Elgouhari H, Othman M, Gerstein WH. *Bacteroides fragilis* vertebral osteomyelitis: case report and a review of the literature. *South Med J* 2007; **100**: 506–11.
- 71 Pappas G, Papadimitriou P, Akritidis N et al. The new global map of human brucellosis. *Lancet Infect Dis* 2006; **6**: 91–9.
- 72 Sakkas LI, Davas EM, Kapsalaki E et al. Hematogenous spinal infection in central Greece. *Spine (Phila Pa 1976)* 2009; **34**: E513–8.
- 73 Pappas G, Akritidis N, Bosilkovski M et al. Brucellosis. *N Engl J Med* 2005; **352**: 2325–36.
- 74 Bravo MJ, Colmenero Jde D, Alonso A et al. HLA-B\*39 allele confers susceptibility to osteoarticular complications in human brucellosis. *J Rheumatol* 2003; **30**: 1051–3.
- 75 Colmenero JD, Ruiz-Mesa JD, Plata A et al. Clinical findings, therapeutic approach, and outcome of brucellar vertebral osteomyelitis. *Clin Infect Dis* 2008; **46**: 426–33.
- 76 Bodur H, Erbay A, Colpan A et al. Brucellar spondylitis. *Rheumatol Int* 2004; **24**: 221–6.
- 77 Namiduru M, Karaoglan I, Gursay S et al. Brucellosis of the spine: evaluation of the clinical, laboratory, and radiological findings of 14 patients. *Rheumatol Int* 2004; **24**: 125–9.
- 78 Lifeso RM, Harder E, McCorkell SJ. Spinal brucellosis. *J Bone Joint Surg Br* 1985; **67**: 345–51.
- 79 Tuli SM. Tuberculosis of the spine: a historical review. *Clin Orthop Relat Res* 2007; **460**: 29–38.
- 80 Cormican L, Hammal R, Messenger J et al. Current difficulties in the diagnosis and management of spinal tuberculosis. *Postgrad Med J* 2006; **82**: 46–51.
- 81 Kenyon PC, Chapman AL. Tuberculous vertebral osteomyelitis: findings of a 10-year review of experience in a UK centre. *J Infect* 2009; **59**: 372–3.
- 82 Pertuiset E, Beaudreuil J, Liote F et al. Spinal tuberculosis in adults. A study of 103 cases in a developed country, 1980–1994. *Medicine (Baltimore)* 1999; **78**: 309–20.
- 83 Yagupsky P. *Kingella kingae*: from medical rarity to an emerging paediatric pathogen. *Lancet Infect Dis* 2004; **4**: 358–67.
- 84 Garron E, Viehweger E, Launay F et al. Nontuberculous spondylodiscitis in children. *J Pediatr Orthop* 2002; **22**: 321–8.
- 85 Hulzebos CV, Koetse HA, Kimpen JL et al. Vertebral osteomyelitis associated with cat-scratch disease. *Clin Infect Dis* 1999; **28**: 1310–2.
- 86 Vermeulen MJ, Rutten GJ, Verhagen I et al. Transient paresis associated with cat-scratch disease: case report and literature review of vertebral osteomyelitis caused by *Bartonella henselae*. *Pediatr Infect Dis J* 2006; **25**: 1177–81.
- 87 Karadimas EJ, Bunker C, Lindblad BE et al. Spondylodiscitis. A retrospective study of 163 patients. *Acta Orthop* 2008; **79**: 650–9.
- 88 Pigrau C, Almirante B, Flores X et al. Spontaneous pyogenic vertebral osteomyelitis and endocarditis: incidence, risk factors, and outcome. *Am J Med* 2005; **118**: 1287.
- 89 Frazier DD, Campbell DR, Garvey TA et al. Fungal infections of the spine. Report of eleven patients with long-term follow-up. *J Bone Joint Surg Am* 2001; **83-A**: 560–5.
- 90 Vinas FC, King PK, Diaz FG. Spinal aspergillus osteomyelitis. *Clin Infect Dis* 1999; **28**: 1223–9.
- 91 Hendrickx L, Van Wijngaerden E, Samson I et al. Candidal vertebral osteomyelitis: report of 6 patients, and a review. *Clin Infect Dis* 2001; **32**: 527–33.
- 92 Kim CW, Perry A, Currier B et al. Fungal infections of the spine. *Clin Orthop Relat Res* 2006; **444**: 92–9.
- 93 Sullivan CR, Symmonds RE. Disk infections and abdominal pain. *JAMA* 1964; **188**: 655–8.
- 94 Adatepe MH, Powell OM, Isaacs GH et al. Hematogenous pyogenic vertebral osteomyelitis: diagnostic value of radionuclide bone imaging. *J Nucl Med* 1986; **27**: 1680–5.
- 95 Guri J. Pyogenic osteomyelitis of the spine: differential diagnosis through clinical and roentgenographic observations. *J Bone Joint Surg Am* 1946; **28**: 29–39.
- 96 Wirtz DC, Genius I, Wildberger JE et al. Diagnostic and therapeutic management of lumbar and thoracic spondylodiscitis—an evaluation of 59 cases. *Arch Orthop Trauma Surg* 2000; **120**: 245–51.
- 97 Acosta FL Jr, Chin CT, Quinones-Hinojosa A et al. Diagnosis and management of adult pyogenic osteomyelitis of the cervical spine. *Neurosurg Focus* 2004; **17**: E2.
- 98 Eismont FJ, Bohlman HH, Soni PL et al. Pyogenic and fungal vertebral osteomyelitis with paralysis. *J Bone Joint Surg Am* 1983; **65**: 19–29.
- 99 Colmenero JD, Jimenez-Mejias ME, Reguera JM et al. Tuberculous vertebral osteomyelitis in the new millennium: still a diagnostic and therapeutic challenge. *Eur J Clin Microbiol Infect Dis* 2004; **23**: 477–83.
- 100 Nolla JM, Ariza J, Gomez-Vaquero C et al. Spontaneous pyogenic vertebral osteomyelitis in nondrug users. *Semin Arthritis Rheum* 2002; **31**: 271–8.
- 101 Fernandez M, Carrol CL, Baker CJ. Discitis and vertebral osteomyelitis in children: an 18-year review. *Pediatrics* 2000; **105**: 1299–304.
- 102 Brown R, Hussain M, McHugh K et al. Discitis in young children. *J Bone Joint Surg Br* 2001; **83**: 106–11.
- 103 Kayser R, Mahlfeld K, Greulich M et al. Spondylodiscitis in childhood: results of a long-term study. *Spine (Phila Pa 1976)* 2005; **30**: 318–23.
- 104 Wenger DR, Bobechko WP, Gilday DL. The spectrum of intervertebral disc-space infection in children. *J Bone Joint Surg Am* 1978; **60**: 100–8.
- 105 Crawford AH, Kucharzyk DW, Ruda R et al. Diskitis in children. *Clin Orthop Relat Res* 1991; **266**: 70–9.



- 106** An HS, Seldomridge JA. Spinal infections: diagnostic tests and imaging studies. *Clin Orthop Relat Res* 2006; **444**: 27–33.
- 107** Kemp HB, Jackson JW, Jeremiah JD et al. Pyogenic infections occurring primarily in intervertebral discs. *J Bone Joint Surg Br* 1973; **55**: 698–714.
- 108** Carragee EJ, Kim D, van der Vlugt T et al. The clinical use of erythrocyte sedimentation rate in pyogenic vertebral osteomyelitis. *Spine (Phila Pa 1976)* 1997; **22**: 2089–93.
- 109** Zarrouk V, Feydy A, Salles F et al. Imaging does not predict the clinical outcome of bacterial vertebral osteomyelitis. *Rheumatology (Oxford)* 2007; **46**: 292–5.
- 110** Hsieh PC, Wienecke RJ, O'Shaughnessy BA et al. Surgical strategies for vertebral osteomyelitis and epidural abscess. *Neurosurg Focus* 2004; **17**: E4.
- 111** Lillie P, Thaker H, Moss P et al. Healthcare associated discitis in the era of antimicrobial resistance. *J Clin Rheumatol* 2008; **14**: 234–7.
- 112** Sapico FL. Microbiology and antimicrobial therapy of spinal infections. *Orthop Clin North Am* 1996; **27**: 9–13.
- 113** Fouquet B, Goupille P, Gobert F et al. Infectious discitis diagnostic contribution of laboratory tests and percutaneous discovevertebral biopsy. *Rev Rhum Engl Ed* 1996; **63**: 24–9.
- 114** Chew FS, Kline MJ. Diagnostic yield of CT-guided percutaneous aspiration procedures in suspected spontaneous infectious diskitis. *Radiology* 2001; **218**: 211–4.
- 115** Hadjipavlou AG, Kontakis GM, Gaitanis JN et al. Effectiveness and pitfalls of percutaneous transpedicle biopsy of the spine. *Clin Orthop Relat Res* 2003; **411**: 54–60.
- 116** Rankine JJ, Barron DA, Robinson P et al. Therapeutic impact of percutaneous spinal biopsy in spinal infection. *Postgrad Med J* 2004; **80**: 607–9.
- 117** Enoch DA, Cargill JS, Laing R et al. Value of CT-guided biopsy in the diagnosis of septic discitis. *J Clin Pathol* 2008; **61**: 750–3.
- 118** Kornblum MB, Wesolowski DP, Fischgrund JS et al. Computed tomography-guided biopsy of the spine. A review of 103 patients. *Spine (Phila Pa 1976)* 1998; **23**: 81–5.
- 119** Grados F, Lescure FX, Senneville E et al. Suggestions for managing pyogenic (non-tuberculous) discitis in adults. *Joint Bone Spine* 2007; **74**: 133–9.
- 120** Société de Pathologie Infectieuse de Langue Française (SPILF). Recommendations pour la pratique clinique. Spondylodiscites infectieuses primitives, et secondaires à un geste intra-discal, sans mise en place de matériel. *Med Mal Infect* 2007; **37**: 554–72.
- 121** Lew DP, Waldvogel FA. Osteomyelitis. *Lancet* 2004; **364**: 369–79.
- 122** Yang SC, Fu TS, Chen LH et al. Identifying pathogens of spondylodiscitis: percutaneous endoscopy or CT-guided biopsy. *Clin Orthop Relat Res* 2008; **466**: 3086–92.
- 123** Lucio E, Adesokan A, Hadjipavlou AG et al. Pyogenic spondylodiscitis: a radiologic/pathologic and culture correlation study. *Arch Pathol Lab Med* 2000; **124**: 712–6.
- 124** Michel SC, Pfirrmann CW, Boos N et al. CT-guided core biopsy of subchondral bone and intervertebral space in suspected spondylodiscitis. *AJR Am J Roentgenol* 2006; **186**: 977–80.
- 125** Gotuzzo E, Carrillo C, Guerra J et al. An evaluation of diagnostic methods for brucellosis—the value of bone marrow culture. *J Infect Dis* 1986; **153**: 122–5.
- 126** Harris KA, Hartley JC. Development of broad-range 16S rDNA PCR for use in the routine diagnostic clinical microbiology service. *J Med Microbiol* 2003; **52**: 685–91.
- 127** Fenollar F, Levy PY, Raoult D. Usefulness of broad-range PCR for the diagnosis of osteoarticular infections. *Curr Opin Rheumatol* 2008; **20**: 463–70.
- 128** Fursted K, Arpi M, Lindblad BE et al. Broad-range PCR as a supplement to culture for detection of bacterial pathogens in patients with a clinically diagnosed spinal infection. *Scand J Infect Dis* 2008; **40**: 772–7.
- 129** Fenollar F, Roux V, Stein A et al. Analysis of 525 samples to determine the usefulness of PCR amplification and sequencing of the 16S rRNA gene for diagnosis of bone and joint infections. *J Clin Microbiol* 2006; **44**: 1018–28.
- 130** Fihman V, Hannouche D, Bousson V et al. Improved diagnosis specificity in bone and joint infections using molecular techniques. *J Infect* 2007; **55**: 510–17.
- 131** Taylor AG, Cook J, Fincham WJ et al. Serological tests in the differentiation of staphylococcal and tuberculous bone disease. *J Clin Pathol* 1975; **28**: 284–8.
- 132** Legrand E, Massin P, Levasseur R et al. Stratégie diagnostique et principes thérapeutiques au cours des spondylodiscites infectieuses bactériennes. *Rev Rhum* 2006; **73**: 373–9.
- 133** Modic MT, Feiglin DH, Piraino DW et al. Vertebral osteomyelitis: assessment using MR. *Radiology* 1985; **157**: 157–66.
- 134** Forrester DM. Infectious spondylitis. *Semin Ultrasound CT MR* 2004; **25**: 461–73.
- 135** Jevtic V. Vertebral infection. *Eur Radiol* 2004; **14**(Suppl 3): E43–52.
- 136** Gemmel F, Dumarey N, Palestro CJ. Radionuclide imaging of spinal infections. *Eur J Nucl Med Mol Imaging* 2006; **33**: 1226–37.
- 137** Lisbona R, Derbekyan V, Novales-Diaz J et al. Gallium-67 scintigraphy in tuberculous and nontuberculous infectious spondylitis. *J Nucl Med* 1993; **34**: 853–9.
- 138** Palestro CJ, Kim CK, Swyer AJ et al. Radionuclide diagnosis of vertebral osteomyelitis: indium-111-leukocyte and technetium-99m-methylene diphosphonate bone scintigraphy. *J Nucl Med* 1991; **32**: 1861–5.
- 139** Schmitz A, Risse JH, Grunwald F et al. Fluorine-18 fluorodeoxyglucose positron emission tomography findings in spondylodiscitis: preliminary results. *Eur Spine J* 2001; **10**: 534–9.
- 140** Stumpe KD, Zanetti M, Weishaupt D et al. FDG positron emission tomography for differentiation of degenerative and infectious endplate abnormalities in the lumbar spine detected on MR imaging. *AJR Am J Roentgenol* 2002; **179**: 1151–7.
- 141** Sharif HS. Role of MR imaging in the management of spinal infections. *AJR Am J Roentgenol* 1992; **158**: 1333–45.
- 142** Ledermann HP, Schweitzer ME, Morrison WB et al. MR imaging findings in spinal infections: rules or myths? *Radiology* 2003; **228**: 506–14.
- 143** Dagirmanjian A, Schils J, McHenry M et al. MR imaging of vertebral osteomyelitis revisited. *AJR Am J Roentgenol* 1996; **167**: 1539–43.
- 144** Post MJ, Sze G, Quencer RM et al. Gadolinium-enhanced MR in spinal infection. *J Comput Assist Tomogr* 1990; **14**: 721–9.
- 145** Smith AS, Weinstein MA, Mizushima A et al. MR imaging characteristics of tuberculous spondylitis vs vertebral osteomyelitis. *AJR Am J Roentgenol* 1989; **153**: 399–405.
- 146** Kayani I, Syed I, Saifuddin A et al. Vertebral osteomyelitis without disc involvement. *Clin Radiol* 2004; **59**: 881–91.
- 147** Carragee EJ. The clinical use of magnetic resonance imaging in pyogenic vertebral osteomyelitis. *Spine (Phila Pa 1976)* 1997; **22**: 780–5.
- 148** Gillams AR, Chaddha B, Carter AP. MR appearances of the temporal evolution and resolution of infectious spondylitis. *AJR Am J Roentgenol* 1996; **166**: 903–7.



- 149** Kowalski TJ, Berbari EF, Huddleston PM *et al.* Do follow-up imaging examinations provide useful prognostic information in patients with spine infection? *Clin Infect Dis* 2006; **43**: 172–9.
- 150** Kowalski TJ, Layton KF, Berbari EF *et al.* Follow-up MR imaging in patients with pyogenic spine infections: lack of correlation with clinical features. *AJNR Am J Neuroradiol* 2007; **28**: 693–9.
- 151** Quinones-Hinojosa A, Jun P, Jacobs R *et al.* General principles in the medical and surgical management of spinal infections: a multidisciplinary approach. *Neurosurg Focus* 2004; **17**: E1.
- 152** Bauman GI, Stifel RE. Osteomyelitis of the spine. *Ann Surg* 1923; **78**: 119–21.
- 153** Liebergall M, Chaimsky G, Lowe J *et al.* Pyogenic vertebral osteomyelitis with paralysis. Prognosis and treatment. *Clin Orthop Relat Res* 1991; **269**: 142–50.
- 154** Woertgen C, Rothoerl RD, Englert C *et al.* Pyogenic spinal infections and outcome according to the 36-item short form health survey. *J Neurosurg Spine* 2006; **4**: 441–6.
- 155** Roblot F, Besnier JM, Juhel L *et al.* Optimal duration of antibiotic therapy in vertebral osteomyelitis. *Semin Arthritis Rheum* 2007; **36**: 269–77.
- 156** Nathwani D, Barlow GD, Ajdukiewicz K *et al.* Cost-minimization analysis and audit of antibiotic management of bone and joint infections with ambulatory teicoplanin, in-patient care or outpatient oral linezolid therapy. *J Antimicrob Chemother* 2003; **51**: 391–6.
- 157** Tice AD, Hoaglund PA, Shoultz DA. Outcomes of osteomyelitis among patients treated with outpatient parenteral antimicrobial therapy. *Am J Med* 2003; **114**: 723–8.
- 158** Zeller V, Desplaces N. Antibiotherapy of bone and joint infections. *Rev Rhum* 2006; **73**: 183–90.
- 159** Brown EM, Pople IK, de Louvois J *et al.* Spine update: prevention of postoperative infection in patients undergoing spinal surgery. *Spine (Phila Pa 1976)* 2004; **29**: 938–45.
- 160** Gibson MJ, Karpinski MR, Slack RC *et al.* The penetration of antibiotics into the normal intervertebral disc. *J Bone Joint Surg Br* 1987; **69**: 784–6.
- 161** Walters R, Moore R, Fraser R. Penetration of cephazolin in human lumbar intervertebral disc. *Spine (Phila Pa 1976)* 2006; **31**: 567–70.
- 162** National Institute of Clinical Excellence. Tuberculosis. March 2006. <http://guidance.nice.org.uk/CG33/Guidance/pdf/English> (26 April 2010, date last accessed).
- 163** Blumberg HM, Burman WJ, Chaisson RE *et al.* American Thoracic Society/Centers for Disease Control and Prevention/Infectious Diseases Society of America: treatment of tuberculosis. *Am J Respir Crit Care Med* 2003; **167**: 603–62.
- 164** Ariza J, Bosilkovski M, Cascio A *et al.* Perspectives for the treatment of brucellosis in the 21st century: the Ioannina recommendations. *PLoS Med* 2007; **4**: e317.
- 165** Gemmell CG, Edwards DI, Fraise AP *et al.* Guidelines for the prophylaxis and treatment of methicillin-resistant *Staphylococcus aureus* (MRSA) infections in the UK. *J Antimicrob Chemother* 2006; **57**: 589–608.
- 166** Gould FK, Brindle R, Chadwick PR *et al.* Guidelines (2008) for the prophylaxis and treatment of methicillin-resistant *Staphylococcus aureus* (MRSA) infections in the United Kingdom. *J Antimicrob Chemother* 2009; **63**: 849–61.
- 167** Pappas PG, Kauffman CA, Andes D *et al.* Clinical practice guidelines for the management of candidiasis: 2009 update by the Infectious Diseases Society of America. *Clin Infect Dis* 2009; **48**: 503–35.
- 168** Walsh TJ, Anaissie EJ, Denning DW *et al.* Treatment of aspergillosis: clinical practice guidelines of the Infectious Diseases Society of America. *Clin Infect Dis* 2008; **46**: 327–60.
- 169** Galgiani JN, Ampel NM, Blair JE *et al.* Coccidioidomycosis. *Clin Infect Dis* 2005; **41**: 1217–23.
- 170** Chapman SW, Dismukes WE, Proia LA *et al.* Clinical practice guidelines for the management of blastomycosis: 2008 update by the Infectious Diseases Society of America. *Clin Infect Dis* 2008; **46**: 1801–12.
- 171** Atkins B, Gottlieb T. Fusidic acid in bone and joint infections. *Int J Antimicrob Agents* 1999; **12** Suppl 2: S79–93.
- 172** Perlroth J, Kuo M, Tan J *et al.* Adjunctive use of rifampin for the treatment of *Staphylococcus aureus* infections: a systematic review of the literature. *Arch Intern Med* 2008; **168**: 805–19.
- 173** Norden CW, Fierer J, Bryant RE. Chronic staphylococcal osteomyelitis: treatment with regimens containing rifampin. *Rev Infect Dis* 1983; **5** Suppl 3: S495–501.
- 174** Norden CW, Bryant R, Palmer D *et al.* Chronic osteomyelitis caused by *Staphylococcus aureus*: controlled clinical trial of nafcillin therapy and nafcillin-rifampin therapy. *South Med J* 1986; **79**: 947–51.
- 175** Zimmerli W, Widmer AF, Blatter M *et al.* Role of rifampin for treatment of orthopedic implant-related staphylococcal infections: a randomized controlled trial. Foreign-Body Infection (FBI) Study Group. *JAMA* 1998; **279**: 1537–41.
- 176** Van der Auwera P, Meunier-Carpentier F, Klastersky J. Clinical study of combination therapy with oxacillin and rifampin for staphylococcal infections. *Rev Infect Dis* 1983; **5** Suppl 3: S515–22.
- 177** Van der Auwera P, Klastersky J, Thys JP *et al.* Double-blind, placebo-controlled study of oxacillin combined with rifampin in the treatment of staphylococcal infections. *Antimicrob Agents Chemother* 1985; **28**: 467–72.
- 178** Livorsi DJ, Daver NG, Atmar RL *et al.* Outcomes of treatment for hematogenous *Staphylococcus aureus* vertebral osteomyelitis in the MRSA era. *J Infect* 2008; **57**: 128–31.
- 179** Viale P, Furlanut M, Scudeller L *et al.* Treatment of pyogenic (non-tuberculous) spondylodiscitis with tailored high-dose levofloxacin plus rifampicin. *Int J Antimicrob Agents* 2009; **33**: 379–82.
- 180** Stengel D, Bauwens K, Sehouli J *et al.* Systematic review and meta-analysis of antibiotic therapy for bone and joint infections. *Lancet Infect Dis* 2001; **1**: 175–88.
- 181** Cosgrove SE, Vigliani GA, Fowler VG Jr *et al.* Initial low-dose gentamicin for *Staphylococcus aureus* bacteremia and endocarditis is nephrotoxic. *Clin Infect Dis* 2009; **48**: 713–21.
- 182** Falagas ME, Giannopoulou KP, Ntziora F *et al.* Daptomycin for treatment of patients with bone and joint infections: a systematic review of the clinical evidence. *Int J Antimicrob Agents* 2007; **30**: 202–9.
- 183** Lalani T, Boucher HW, Cosgrove SE *et al.* Outcomes with daptomycin versus standard therapy for osteoarticular infections associated with *Staphylococcus aureus* bacteraemia. *J Antimicrob Chemother* 2008; **61**: 177–82.
- 184** Rayner CR, Baddour LM, Birmingham MC *et al.* Linezolid in the treatment of osteomyelitis: results of compassionate use experience. *Infection* 2004; **32**: 8–14.
- 185** Yin LY, Lazzarini L, Li F *et al.* Comparative evaluation of tigecycline and vancomycin, with and without rifampicin, in the treatment of methicillin-resistant *Staphylococcus aureus* experimental osteomyelitis in a rabbit model. *J Antimicrob Chemother* 2005; **55**: 995–1002.
- 186** Rybak M, Lomaestro B, Rotschafer JC *et al.* Therapeutic monitoring of vancomycin in adult patients: a consensus review of the American Society of Health-System Pharmacists, the Infectious Diseases Society of America, and the Society of Infectious Diseases Pharmacists. *Am J Health Syst Pharm* 2009; **66**: 82–98.

- 187** Chen WH, Jiang LS, Dai LY. Surgical treatment of pyogenic vertebral osteomyelitis with spinal instrumentation. *Eur Spine J* 2007; **16**: 1307–16.
- 188** Lehovsky J. Pyogenic vertebral osteomyelitis/disc infection. *Baillieres Best Pract Res Clin Rheumatol* 1999; **13**: 59–75.
- 189** Hee HT, Majd ME, Holt RT et al. Better treatment of vertebral osteomyelitis using posterior stabilization and titanium mesh cages. *J Spinal Disord Tech* 2002; **15**: 149–56; discussion 56.
- 190** Darouiche RO. Spinal epidural abscess. *N Engl J Med* 2006; **355**: 2012–20.
- 191** Staatz G, Adam GB, Keulers P et al. Spondylodiskitic abscesses: CT-guided percutaneous catheter drainage. *Radiology* 1998; **208**: 363–7.
- 192** Siddiq F, Chowfin A, Tight R et al. Medical vs surgical management of spinal epidural abscess. *Arch Intern Med* 2004; **164**: 2409–12.
- 193** Rath SA, Neff U, Schneider O et al. Neurosurgical management of thoracic and lumbar vertebral osteomyelitis and discitis in adults: a review of 43 consecutive surgically treated patients. *Neurosurgery* 1996; **38**: 926–33.
- 194** O'Shaughnessy BA, Kuklo TR, Ondra SL. Surgical treatment of vertebral osteomyelitis with recombinant human bone morphogenetic protein-2. *Spine (Phila Pa 1976)* 2008; **33**: E132–9.
- 195** Hadjipavlou AG, Katonis PK, Gaitanis IN et al. Percutaneous transpedicular discectomy and drainage in pyogenic spondylodiscitis. *Eur Spine J* 2004; **13**: 707–13.
- 196** Solis Garcia del Pozo J, Vives Soto M, Solera J. Vertebral osteomyelitis: long-term disability assessment and prognostic factors. *J Infect* 2007; **54**: 129–34.
